# Supplementary material for: lncRNA SNHG26 promoted the growth, metastasis, and cisplatin resistance of tongue squamous cell carcinoma through PGK1/Akt/mTOR signal pathway
Source: PubMed Central journal article supplement — Mol Ther Oncolytics. 2021 Dec 31;24:355–70. doi: 10.1016/j.omto.2021.12.021 (PMC8783117; doi:10.1016/j.omto.2021.12.021), 2021-12-31
Supplement: mmc1.pdf [file mmc1.pdf]

OMTO, Volume 24

## Supplemental information

**lncRNA SNHG26 promoted the growth, metastasis,  
and cisplatin resistance of tongue squamous cell  
carcinoma through PGK1/Akt/mTOR signal pathway**

**Qingkun Jiang, Zhonghao Wang, Qi Qi, Jialun Li, Yuqi Xin, and Jiaxuan Qiu**

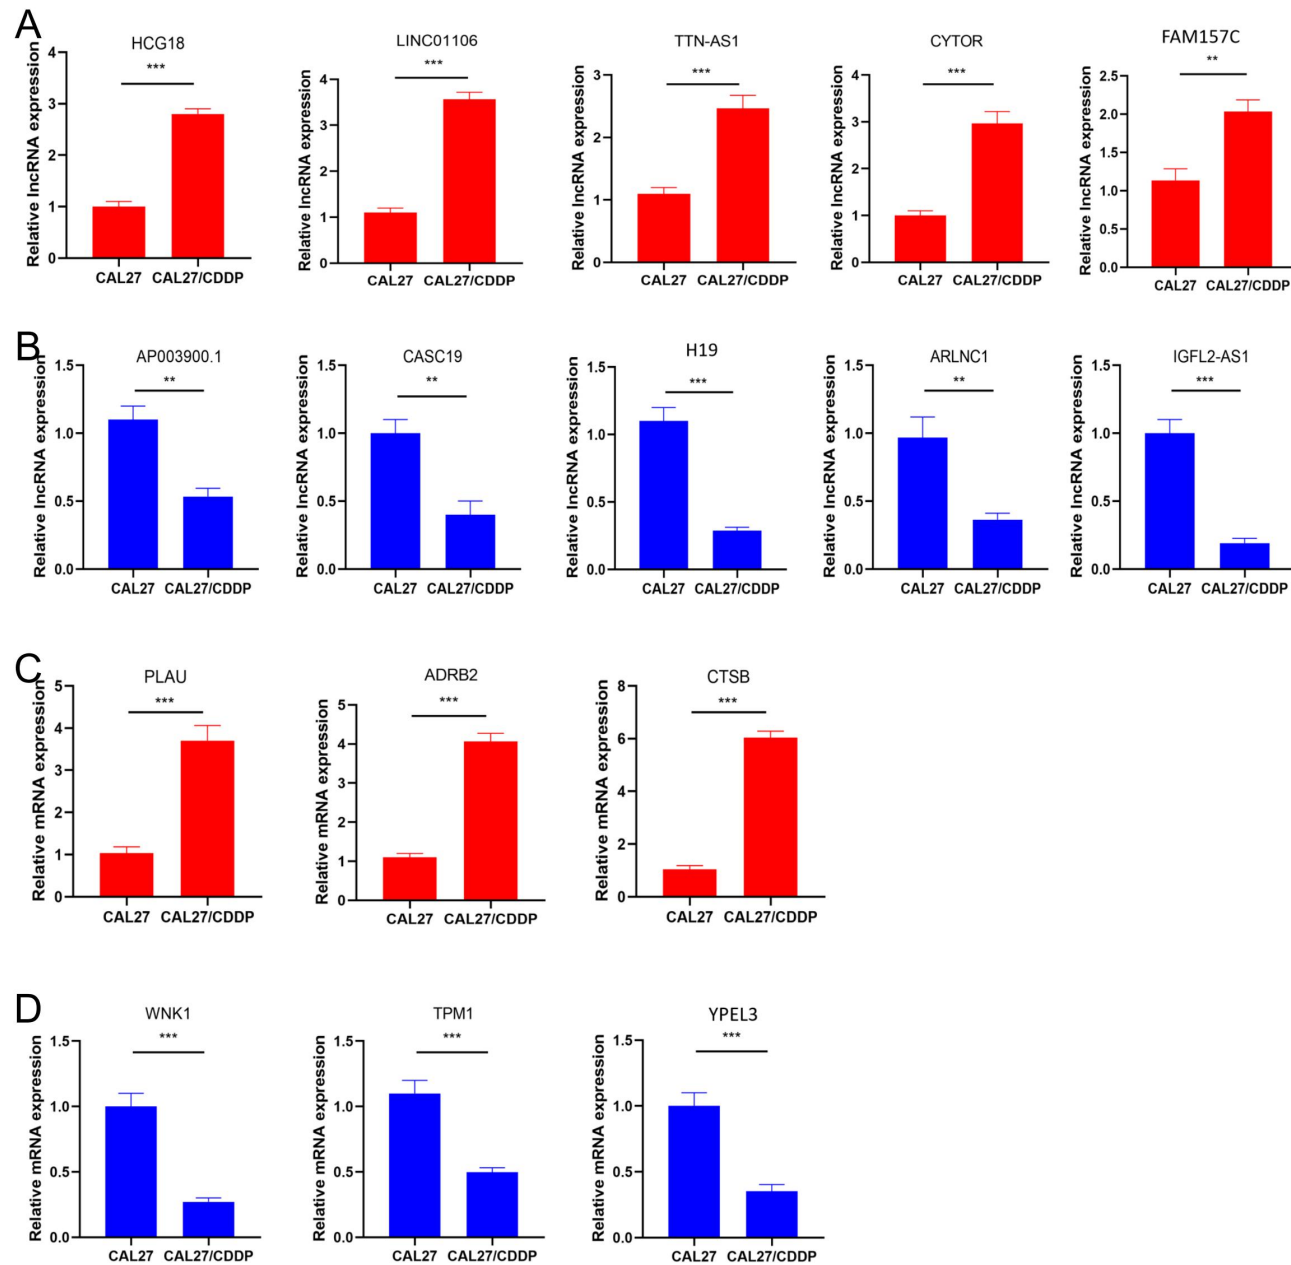

Figure S1. Expression levels of 10 lncRNAs (a, b) and 6 mRNAs (c, d) by qRT-PCR in CAL27 and CAL27/CDDP cells. The mean  $\pm$  SD of triplicate experiments were plotted. \*  $P < 0.05$ , \*\*  $P < 0.01$ , \*\*\* $P < 0.001$ .

A

GAAGCAGTGTGAGCTAGCGTCTAAGGATTGTGAAAAGTGAAGTCAAGTGGCC  
 AGAACTAGAAAACCTCCAGCCCCCTGAACTCAGCCTCAGGGTAAGCGAGT  
 TTAATAGTGCTTCCTTTGATTTTCAAATCTGTGGAAGGTTTGTTCAGTTTTT  
 CCCAGACAAATATTGTTGGGATAGTGTTCCTTTCAAAAATGGATAGGATTC  
 AATGCTCATCAGTGGGAAGATAGTGACTCCTGACCATTTTCCTCCTAGCTG  
 GAAACTACAGAAGACTCCCAAGTATCAGGAAATTTGGAGAATTTGTACAGG  
 AATTATATTCAGAGATAGCAATTTATTTACTCATCAAAGAGAGCTATTGGATA  
 GCCACCATAAAGACCACTCATTAAAAACAAAATTGCATGATATTCTTAACA  
 TTGTCTTTCACTTTTTTAACCAGGCTTGGTGGAGTTTCAAGATGCTGATG  
 AACTTAAGGTCTGGCGCTTGAAGAATCAGTGAAGCTTTTCAAGTAGAGG  
 AGGTATATTTGAATATGTAACCTTAGTATCTACAGAATAGAGGTTGCTTTTT  
 TTTTTTTT

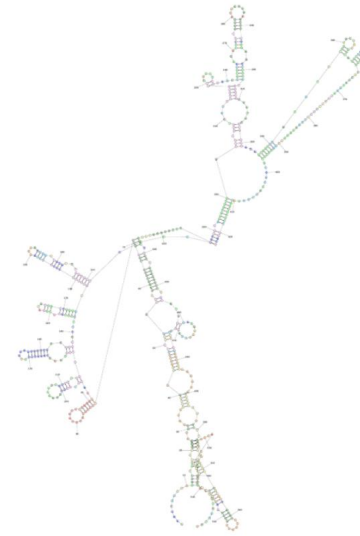

Probability >= 99%  
 99% > Probability >= 95%  
 95% > Probability >= 90%  
 90% > Probability >= 80%  
 80% > Probability >= 70%  
 70% > Probability >= 60%  
 60% > Probability >= 50%  
 50% > Probability  
 ENERGY = -137.9 SNHG26

B

Protein coding potential

| Metric                           | Raw result | Interpretation |
|----------------------------------|------------|----------------|
| PRIDE reprocessing 2.0           | 0          | non-coding     |
| Lee translation initiation sites | 0          | non-coding     |
| PhyloCSF score                   | -280.9938  | non-coding     |
| CPAT coding probability          | 1.22%      | non-coding     |
| Bazzini small ORFs               | 0          | non-coding     |

Figure S2. The full-length sequence of SNHG26 and the secondary mechanism of prediction (a). Prediction of coding ability of SNHG26 (b).
